# Supplementary material
Source: publisher figshare collection journal article supplement (https://acs.figshare.com/ndownloader/files/6014124)
Supplement: Supplementary file 1 [file 6014124]

---

# **Synergistic Effects of Conductive 3D Nano-fibrous Micro-environments and Electrical Stimulation on the Viability and Proliferation of Mesenchymal Stem Cells**

Lin Jin,<sup>†,‡</sup> Qinwei Xu,<sup>‡</sup> Shuyi Wu,<sup>⊥</sup> Shreyas Kuddannaya,<sup>‡</sup> Cheng Li,<sup>‡</sup> Jingbin Huang,<sup>†</sup> Yilei Zhang,<sup>‡\*</sup> Zhenling Wang<sup>†\*</sup>

<sup>†</sup>The Key Laboratory of Rare Earth Functional Materials and Applications, Zhoukou Normal University, Zhoukou 466001, P. R. China

<sup>‡</sup>School of Mechanical & Aerospace Engineering, Nanyang Technological University, 50 Nanyang Avenue, Singapore 639798, Singapore

<sup>⊥</sup>Department of Prosthodontics, Guanghua School of Stomatology, Hospital of Stomatology, Sun Yat-sen University, Guangzhou, 510055, P. R. China

\*Corresponding author. *E-mail:* [ylzhang@ntu.edu.sg](mailto:ylzhang@ntu.edu.sg), [zlwang2007@hotmail.com](mailto:zlwang2007@hotmail.com),

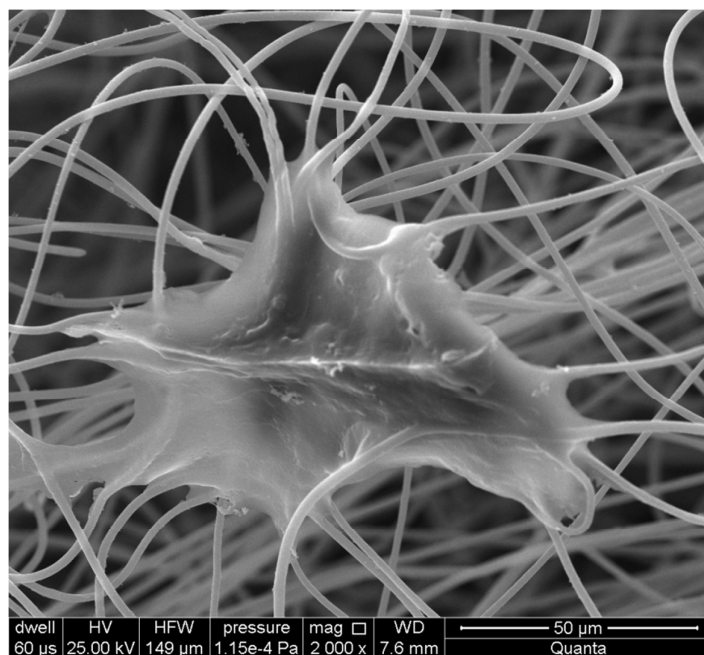

Figure S1. Morphology of hMSCs cultured 5 days in the 3D-CSNFs under ES.
